# Supplementary material
Source: HighWire-hosted journal article supplement (https://svn.smart01.highwire.org/content/6/3/376)
Supplement: inline-supplementary-material-2 [file inline-supplementary-material-2.pdf]

**Table S6. Recurrent Ischemic or Hemorrhagic Stroke in Patients with Acute Ischemic Stroke or TIA by 3-Month Composite Persistence**

| Outcomes                      | Composite persistence | No.  | Events,<br>n (%) | Model 1*                |         | Model 2†                |         |
|-------------------------------|-----------------------|------|------------------|-------------------------|---------|-------------------------|---------|
|                               |                       |      |                  | Adjusted HR<br>(95% CI) | P value | Adjusted HR<br>(95% CI) | P value |
| <b>Ischemic<br/>stroke</b>    | Level I               | 4397 | 127(2.9)         | 1.00(Ref)               |         | 1.00(Ref)               |         |
|                               | Level II              | 5464 | 71(1.3)          | 0.46(0.34-0.61)         | <0.001  | 0.38(0.28-0.52)         | <0.001  |
|                               | Level III             | 8483 | 90(1.1)          | 0.38(0.29-0.50)         | <0.001  | 0.35(0.26-0.46)         | <0.001  |
| <b>Hemorrhagic<br/>stroke</b> | Level I               | 4397 | 4(0.09)          | 1.00(Ref)               |         | 1.00(Ref)               |         |
|                               | Level II              | 5464 | 7(0.13)          | 1.35(0.40-4.64)         | 0.63    | 1.22(0.34-4.29)         | 0.76    |
|                               | Level III             | 8483 | 6(0.07)          | 0.76(0.21-2.70)         | 0.67    | 0.76(0.21-2.75)         | 0.69    |

CI, confidence interval; HR, hazard ratio; Ref, Reference.

Composite persistence was defined as the percentage (0% to 100%) of discharge medication classes that patients were still taking at 3 months. Level I: persistence=0%; Level II: 0%<persistence<100%; Level III: persistence=100%.

\*Model 1: adjusted for age and sex.

†Model 2: adjusted for patient and hospital characteristics, including age, sex, ethnicity, education level, health insurance, family income per month, history of hypertension, diabetes, dyslipidemia, atrial fibrillation, myocardial infarction, coronary artery disease, previous TIA or stroke, ever smoking, and drinking,

admission NIHSS score, type of disease, severity of illness at discharge, new stroke within 3 months, hospital grade, region, teaching hospital, stroke unit, hospital beds and No. of neurological ward beds.
