# Supplementary material
Source: HighWire-hosted journal article supplement (https://svn.smart01.highwire.org/content/6/3/376)

**Figure 3. Persistence in Secondary Prevention Medication Class**

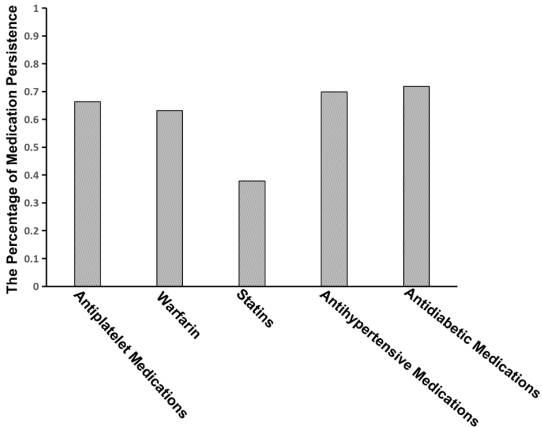

Supplement: inline-supplementary-material-4 [file inline-supplementary-material-4.pdf]
